# Supplementary material
Source: PubMed Central journal article supplement (PMC4651086)
Supplement: AEM.02464-15_zam999116762so1.pdf [file AEM.02464-15_zam999116762so1.pdf]

## Supplemental information

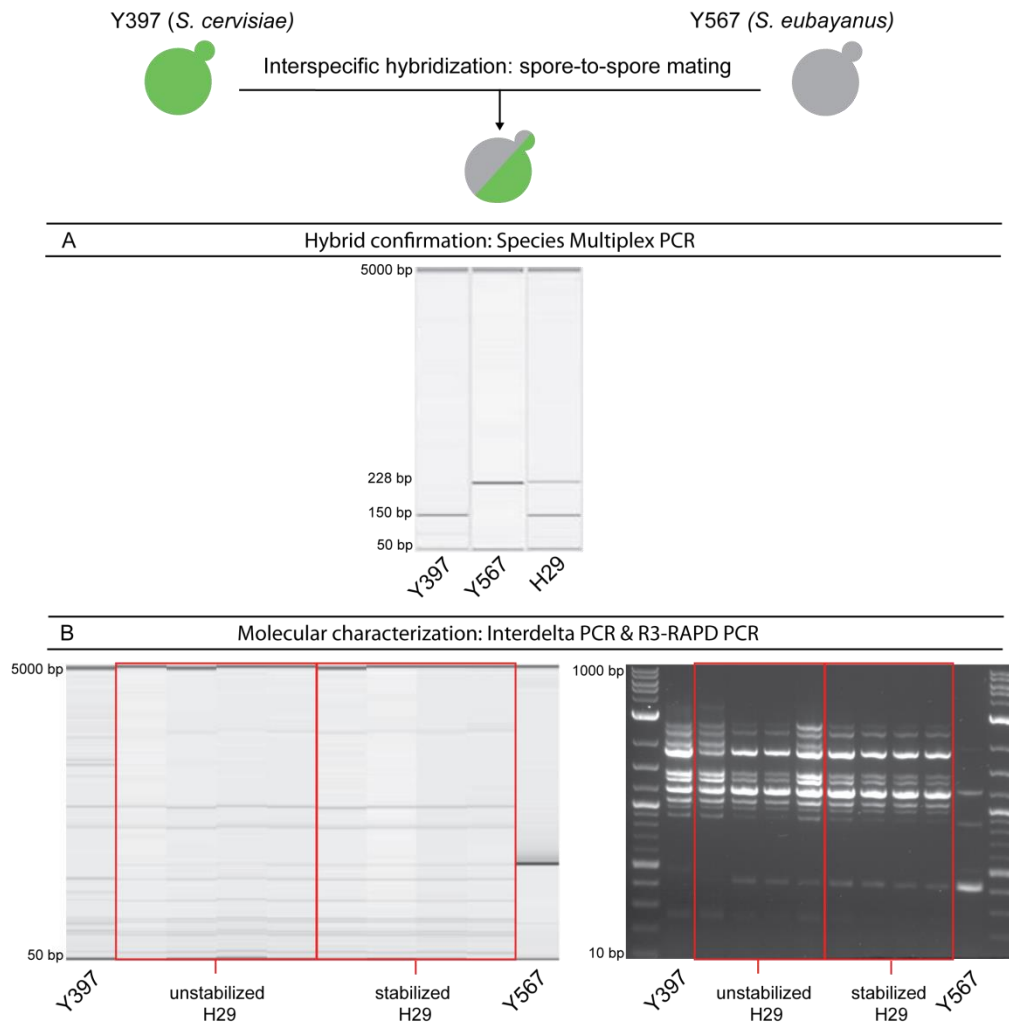

**Fig. S1 Example of performed molecular analyses on hybrid nature and stability check of hybrid H29.** (A) Hybrid nature of possible hybrids was assessed based on the species multiplex PCR (see Materials and Methods for details). Two bands (each originating from both parents), confirm the hybrid nature of H29 (ale-type *S. cerevisiae* Y397 X *S. eubayanus* Y567). (B) Hybrid genome stability was assessed performing two DNA-fingerprints before (lanes 2-5) and after the applied stabilization protocol (lanes 6-9) and compared with its respective parental strains (interdelta analysis (left) and RAPD-R3 (right); see Materials and Methods for details). Interdelta profiles of hybrids before and after stabilization were the same. RAPD-R3 fingerprints of hybrid

H29 before stabilization showed differences, whereas after the stabilization protocol no heterogeneity in hybrids was detected. This indicates that the newly developed hybrids after stabilization were stable.

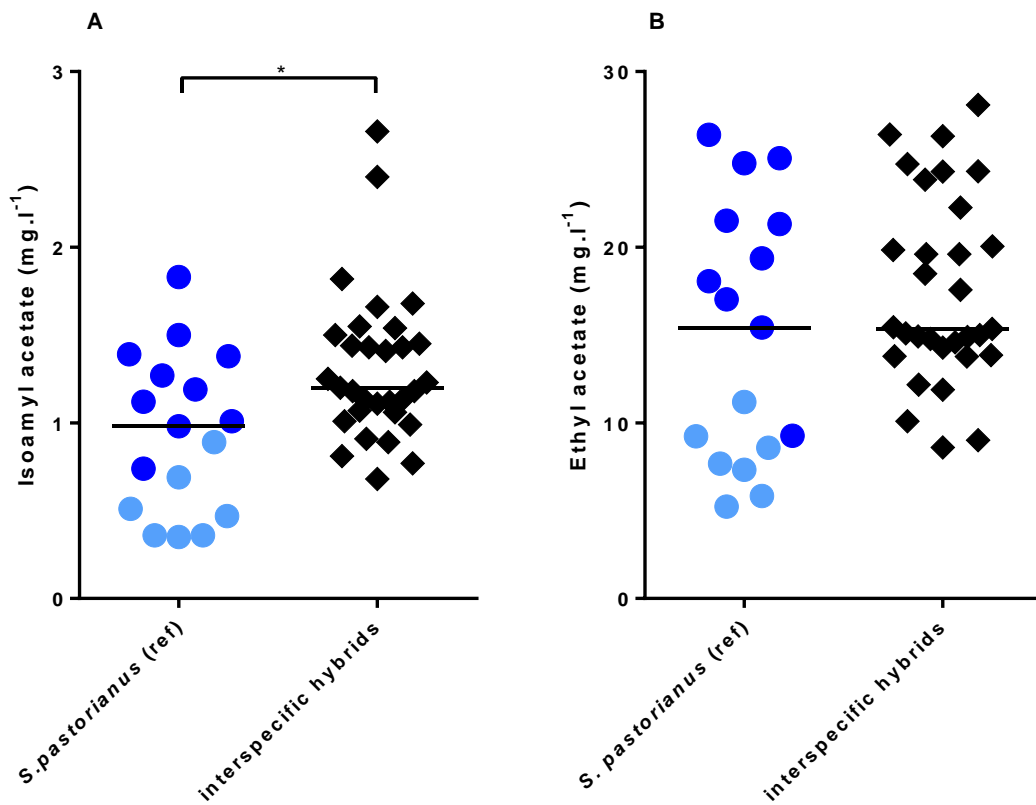

**Fig. S2 Comparison of (A) isoamyl acetate and (B) ethyl acetate production of developed interspecific hybrids and 17 reference *S. pastorianus* strains.** The production of isoamyl acetate and ethyl acetate for 7 Saaz type (light blue circles) and 10 Froberg type (dark blue circles) *S. pastorianus* strains is compared to the production of the developed interspecific hybrids. The median aroma production is depicted as a black horizontal line. The developed interspecific hybrids produced a significant higher amount of isoamyl acetate compared to the 17 *S. pastorianus* strains (Mann-Whitney test;  $p < 0.05$  (\*))

**Table S1 overview aroma and ethanol production from lab scale lager beer fermentation tests.** DNA content is represented as times the average DNA content of the haploid reference yeasts (“/” means not measured). Quantified yeast-related aroma compounds are represented as concentrations (mg.l<sup>-1</sup>), 4-VG production capacity is qualitatively indicated (+ and -) and the measured final ethanol content as volume percentages. Lastly, the used score legend for flavors during sensory analysis was: VS = very slightly; S = slightly; V = very; N =neutral; SW = sweet; FR = fruity; FL = floral; SULF = sulphury; SOLV = solvent-like; FRESH = fresh.

|            | DNA content | Acetaldehyde (mg.l <sup>-1</sup> ) | Ethyl acetate (mg.l <sup>-1</sup> ) | Ethyl propionate (mg.l <sup>-1</sup> ) | Isobutyl acetate (mg.l <sup>-1</sup> ) | Ethyl Butyrate (mg.l <sup>-1</sup> ) | Propanol (mg.l <sup>-1</sup> ) | Isobutanol (mg.l <sup>-1</sup> ) | Isoamyl acetate (mg.l <sup>-1</sup> ) | Butanol (mg.l <sup>-1</sup> ) | Isoamyl alcohol (mg.l <sup>-1</sup> ) | Phenyl ethyl acetate (mg.l <sup>-1</sup> ) | Phenyl ethanol (mg.l <sup>-1</sup> ) | ethanol (%v/v <sup>-1</sup> ) | Potential to produce 4-VG | Sensoryanalysis |
|------------|-------------|------------------------------------|-------------------------------------|----------------------------------------|----------------------------------------|--------------------------------------|--------------------------------|----------------------------------|---------------------------------------|-------------------------------|---------------------------------------|--------------------------------------------|--------------------------------------|-------------------------------|---------------------------|-----------------|
| <b>H1</b>  | 1,67        | 22.36                              | 13.78                               | 0.25                                   | 0.09                                   | 0.11                                 | 6.79                           | 12.08                            | 1.12                                  | 0.64                          | 48.78                                 | 0.70                                       | 6.97                                 | 4.78                          | +                         | SW              |
| <b>H2</b>  | 1,39        | 23.18                              | 11.88                               | 0.22                                   | 0.07                                   | 0.10                                 | 5.72                           | 9.01                             | 1.13                                  | 0.52                          | 38.21                                 | 0.81                                       | 9.00                                 | 4.54                          | +                         | SW              |
| <b>H3</b>  | 1,69        | 22.64                              | 14.77                               | 0.33                                   | 0.07                                   | 0.08                                 | 8.85                           | 14.19                            | 0.91                                  | 0.75                          | 71.91                                 | 0.88                                       | 12.09                                | 5.56                          | +                         | SULF            |
| <b>H4</b>  | 1,64        | 29.30                              | 13.80                               | 0.28                                   | 0.08                                   | 0.12                                 | 7.07                           | 10.19                            | 1.20                                  | 0.69                          | 46.94                                 | 1.02                                       | 11.87                                | 3.74                          | +                         | VSSW            |
| <b>H5</b>  | 1,75        | 20.94                              | 20.05                               | 0.43                                   | 0.08                                   | 0.13                                 | 6.70                           | 10.56                            | 1.66                                  | 0.71                          | 52.26                                 | 1.22                                       | 17.85                                | 3.88                          | +                         | SW,FRESH        |
| <b>H6</b>  | 2,07        | 19.59                              | 13.86                               | 0.28                                   | 0.07                                   | 0.10                                 | 6.39                           | 9.91                             | 1.18                                  | 0.00                          | 37.85                                 | 0.76                                       | 9.78                                 | 4.48                          | +                         | N               |
| <b>H7</b>  | 1,72        | 19.33                              | 15.00                               | 0.26                                   | 0.10                                   | 0.09                                 | 7.17                           | 12.93                            | 1.25                                  | 0.76                          | 56.07                                 | 1.28                                       | 14.01                                | 3.78                          | +                         | SSW             |
| <b>H8</b>  | 1,91        | 19.56                              | 9.02                                | 0.29                                   | 0.06                                   | 0.12                                 | 6.62                           | 11.97                            | 0.77                                  | 0.86                          | 53.93                                 | 0.75                                       | 13.25                                | 3.76                          | +                         | FR,SW           |
| <b>H9</b>  | 1,59        | 19.84                              | 8.60                                | 0.24                                   | 0.08                                   | 0.06                                 | 6.49                           | 14.16                            | 1.07                                  | 0.74                          | 57.72                                 | 1.09                                       | 32.00                                | 2.96                          | +                         | SW,SFL          |
| <b>H10</b> | 1,85        | 23.68                              | 12.18                               | 0.32                                   | 0.06                                   | 0.08                                 | 6.91                           | 10.90                            | 0.89                                  | 0.68                          | 46.49                                 | 0.87                                       | 10.07                                | 3.96                          | +                         | SW,SSULF        |
| <b>H11</b> | 1,68        | 14.67                              | 10.09                               | 0.30                                   | 0.05                                   | 0.06                                 | 5.90                           | 8.78                             | 0.68                                  | 0.67                          | 41.59                                 | 0.91                                       | 12.02                                | 4.62                          | +                         | N, SSULF        |

|                |      |       |       |      |      |      |       |       |      |      |       |      |       |      |   |               |
|----------------|------|-------|-------|------|------|------|-------|-------|------|------|-------|------|-------|------|---|---------------|
| <b>H12</b>     | 2,91 | 6.97  | 14.89 | 0.16 | 0.07 | 0.11 | 5.62  | 9.27  | 1.06 | 0.19 | 36.12 | 0.74 | 8.79  | 5.30 | + | SW,FR         |
| <b>H13</b>     | 3,62 | 19.69 | 15.35 | 0.28 | 0.08 | 0.18 | 6.25  | 10.98 | 1.23 | 0.26 | 39.67 | 0.86 | 11.18 | 5.50 | + | SSW,SFL       |
| <b>H14</b>     | 2,36 | 9.21  | 19.84 | 0.48 | 0.09 | 0.16 | 9.92  | 14.82 | 1.54 | 1.32 | 75.96 | 1.10 | 27.37 | 4.70 | + | SW, SSULF     |
| <b>H15</b>     | 3,15 | 16.83 | 22.26 | 0.25 | 0.07 | 0.19 | 9.32  | 8.27  | 1.43 | 1.02 | 44.58 | 0.55 | 5.89  | 6.20 | + | N,SULF        |
| <b>H16</b>     | 2,84 | 14.93 | 24.73 | 0.34 | 0.09 | 0.14 | 8.83  | 10.91 | 1.44 | 0.84 | 48.40 | 0.67 | 6.20  | 5.18 | + | SW,FL         |
| <b>H17</b>     | 3,05 | 14.03 | 26.42 | 0.36 | 0.09 | 0.22 | 7.76  | 8.81  | 1.82 | 0.85 | 37.72 | 0.89 | 6.96  | 5.72 | + | SSW,SFL       |
| <b>H18</b>     | 3,43 | 20.91 | 18.49 | 0.29 | 0.09 | 0.21 | 7.94  | 9.45  | 1.45 | 1.03 | 44.23 | 0.69 | 7.92  | 5.32 | + | N,SSULF       |
| <b>H19</b>     | 3,10 | 16.76 | 15.10 | 0.24 | 0.07 | 0.10 | 6.14  | 8.19  | 1.18 | 0.79 | 39.79 | 0.54 | 6.48  | 5.16 | + | SULF          |
| <b>H20</b>     | 3,12 | 24.82 | 23.84 | 0.30 | 0.09 | 0.14 | 6.64  | 7.86  | 1.50 | 0.84 | 28.62 | 0.68 | 4.67  | 4.12 | + | N,SSW         |
| <b>H21</b>     | 3,56 | 24.50 | 14.92 | 0.16 | 0.06 | 0.14 | 7.34  | 8.18  | 1.11 | 0.89 | 40.04 | 0.62 | 7.38  | 4.50 | + | SW,FL         |
| <b>H22</b>     | 2,96 | 8.62  | 24.32 | 0.34 | 0.08 | 0.22 | 6.51  | 6.66  | 1.55 | 0.66 | 32.29 | 0.74 | 6.78  | 4.72 | + | (S)FR         |
| <b>H23</b>     | 2,85 | 19.34 | 19.61 | 0.39 | 0.06 | 0.14 | 8.20  | 8.64  | 1.13 | 1.13 | 44.99 | 0.67 | 7.30  | 5.32 | + | SSW,SFR       |
| <b>H24</b>     | 3,20 | 34.28 | 19.60 | 0.20 | 0.08 | 0.17 | 7.03  | 7.64  | 1.43 | 0.75 | 39.28 | 0.96 | 10.07 | 5.96 | + | N, FR         |
| <b>H25</b>     | 2,77 | 24.62 | 17.58 | 0.20 | 0.05 | 0.31 | 8.10  | 8.06  | 0.81 | 1.05 | 46.13 | 0.72 | 7.07  | 4.72 | + | SSW,SFR       |
| <b>H26</b>     | 3,01 | 23.16 | 14.58 | 0.53 | 0.05 | 0.25 | 6.36  | 7.00  | 1.01 | 1.03 | 41.61 | 0.80 | 7.95  | 5.08 | + | SSW,FL        |
| <b>H27</b>     | 3,03 | 16.59 | 14.28 | 0.26 | 0.06 | 0.08 | 5.89  | 7.61  | 0.99 | 0.76 | 39.20 | 0.80 | 7.89  | 4.28 | + | N             |
| <b>H28</b>     | 2,11 | 8.70  | 15.45 | 0.35 | 0.07 | 0.09 | 6.33  | 8.26  | 1.41 | 0.23 | 37.67 | 1.18 | 10.73 | 4.08 | + | SW,FR         |
| <b>H29</b>     | 2,58 | 14.24 | 26.32 | 0.46 | 0.14 | 0.19 | 9.38  | 12.96 | 2.66 | 0.86 | 73.77 | 2.15 | 41.02 | 6.12 | + | FR, SW, FRESH |
| <b>H30</b>     | 2,24 | 22.63 | 24.31 | 0.40 | 0.10 | 0.14 | 7.01  | 7.72  | 1.68 | 0.77 | 34.97 | 1.12 | 10.18 | 4.76 | + | FR, SW, FRESH |
| <b>H31</b>     | 3,23 | 22.50 | 28.11 | 0.36 | 0.12 | 0.20 | 5.97  | 8.11  | 2.40 | 0.86 | 38.41 | 1.31 | 9.83  | 4.78 | + | FR, SW, FRESH |
| <b>Y134</b>    | 2,94 | 10.71 | 12.47 | 0.19 | 0.05 | 0.12 | 7.90  | 7.69  | 0.94 | 0.23 | 32.44 | 0.76 | 14.11 | 4.40 | - | SFL,SSW, SOLV |
| <b>Y184</b>    | 1,77 | 20.21 | 7.61  | 0.16 | 0.05 | 0.04 | 7.54  | 11.65 | 0.66 | 0.55 | 40.77 | 0.70 | 31.83 | 3.10 | - | SW,VFR        |
| <b>Y397</b>    | 3,77 | 4.24  | 18.57 | 0.41 | 0.08 | 0.10 | 10.24 | 12.19 | 1.51 | 1.04 | 72.08 | 1.34 | 16.47 | 5.00 | + | VFR,SSW       |
| <b>Y377</b>    | 3,72 | 3.91  | 17.49 | 0.23 | 0.07 | 0.21 | 7.35  | 8.85  | 1.39 | 0.75 | 50.21 | 0.57 | 8.21  | 4.52 | + | VSW           |
| <b>Y245</b>    | 4,00 | 3.89  | 16.98 | 0.24 | 0.07 | 0.18 | 7.44  | 6.85  | 1.24 | 0.77 | 32.84 | 0.59 | 7.69  | 4.48 | + | VFR,FL        |
| <b>Y470</b>    | 1,55 | 13.42 | 7.30  | 0.16 | 0.05 | 0.04 | 6.13  | 9.08  | 0.64 | 0.62 | 36.76 | 0.58 | 14.16 | 2.92 | - | SF,SSW        |
| <b>Y565</b>    | 2,03 | 7.77  | 5.66  | 0.11 | 0.06 | 0.04 | 4.81  | 12.37 | 0.64 | 0.68 | 48.13 | 0.80 | 13.09 | 2.76 | + | SSULF         |
| <b>Y567</b>    | 1,59 | 16.58 | 7.36  | 0.20 | 0.07 | 0.05 | 5.68  | 14.96 | 0.69 | 1.01 | 56.04 | 0.87 | 17.55 | 2.38 | + | SULF          |
| <b>GSY132</b>  | 2,52 | 7.01  | 9.26  | 0.36 | 0.05 | 0.07 | 5.70  | 10.59 | 0.74 | 2.80 | 39.31 | 0.74 | 13.85 | 4.20 | - | N             |
| <b>GSY 501</b> | 3,61 | 9.21  | 7.68  | 0.43 | 0.03 | 0.18 | 6.47  | 8.05  | 0.36 | 1.00 | 38.08 | 0.53 | 16.94 | 4.56 | - | VSW,F,FR      |
| <b>GSY134</b>  | /    | 28.20 | 5.23  | 0.30 | N.D. | 0.06 | 4.82  | 6.30  | 0.36 | 0.16 | 35.33 | 0.74 | 18.17 | 3.50 | - | VSSW, N       |
| <b>GSY133</b>  | /    | 8.37  | 5.84  | 0.39 | 0.03 | 0.12 | 5.28  | 7.28  | 0.35 | 0.16 | 30.04 | 0.49 | 22.77 | 4.48 | - | N             |
| <b>GSY129</b>  | /    | 9.37  | 11.19 | 0.33 | 0.05 | 0.11 | 5.28  | 10.23 | 0.89 | N.D. | 38.62 | 0.61 | 13.04 | 4.46 | - | VSSULF, N     |
| <b>GSY131</b>  | /    | 18.23 | 8.59  | 0.32 | N.D. | 0.10 | 4.97  | 5.57  | 0.51 | 0.20 | 34.98 | 0.64 | 22.17 | 6.10 | - | VSSULF,N      |
| <b>GSY509</b>  | /    | 8.75  | 9.23  | 0.28 | 0.05 | 0.16 | 5.75  | 12.06 | 0.69 | N.D. | 43.82 | 0.79 | 8.94  | 5.56 | - | N, VSSW       |
| <b>GSY137</b>  | /    | 13.20 | 7.33  | 0.32 | N.D. | 0.08 | 4.99  | 5.93  | 0.47 | 0.22 | 36.34 | 0.40 | 8.03  | 4.82 | - | VSSULF, N     |
| <b>Y449</b>    | /    | 11.69 | 25.07 | 0.38 | 0.07 | 0.15 | 5.95  | 6.66  | 1.39 | 0.26 | 26.69 | 0.63 | 4.96  | 5.98 | - | FR            |
| <b>Y473</b>    | /    | 11.73 | 24.78 | 0.57 | 0.09 | 0.09 | 9.09  | 11.14 | 1.38 | 0.90 | 40.28 | 1.55 | 12.59 | 4.70 | - | N             |
| <b>Y453</b>    | /    | 7.12  | 19.36 | 0.46 | 0.06 | 0.10 | 8.60  | 8.35  | 1.19 | 0.55 | 35.37 | 1.20 | 9.30  | 5.96 | - | VSSULF,N      |

|               |   |       |       |      |      |      |       |       |      |      |       |      |       |      |   |             |
|---------------|---|-------|-------|------|------|------|-------|-------|------|------|-------|------|-------|------|---|-------------|
| <b>Y454</b>   | / | 9.46  | 21.32 | 0.41 | 0.09 | 0.09 | 7.61  | 9.38  | 1.50 | 0.74 | 37.62 | 1.46 | 9.33  | 5.98 | - | N           |
| <b>GSY516</b> | / | 11.49 | 18.07 | 0.26 | 0.07 | 0.11 | 7.82  | 8.26  | 0.98 | 0.22 | 29.31 | 0.53 | 8.69  | 5.24 | - | VSSULF,VSSW |
| <b>GSY135</b> | / | 11.47 | 15.43 | 0.54 | 0.05 | 0.10 | 9.46  | 6.57  | 1.01 | 0.36 | 30.76 | 1.12 | 27.47 | 3.92 | - | VSSW        |
| <b>Y472</b>   | / | 11.78 | 24.60 | 0.48 | 0.08 | 0.12 | 6.71  | 6.13  | 1.28 | 0.22 | 24.54 | 0.90 | 5.63  | 6.94 | - | N           |
| <b>GSY515</b> | / | 11.52 | 26.40 | 0.52 | 0.11 | 0.08 | 7.58  | 11.11 | 1.83 | 0.59 | 37.91 | 1.51 | 6.80  | 6.08 | - | SW,FR       |
| <b>Y5</b>     | / | 7.19  | 17.04 | 0.66 | 0.06 | 0.09 | 10.17 | 10.39 | 1.12 | 0.87 | 44.72 | 0.86 | 9.09  | 4.96 | - | N, SFL      |

**Table S2 obtained results Kruskal-wallis test and pair wise post hoc Dunn tests for comparison growth capacity of the generated interspecific hybrids with parental strains (Kruskal-Wallis test P-value or Benjamini- Hochberg corrected p-value < 0.05: (\*) or < 0.01 : (\*\*))**

|                      | <u>Kruskal -wallis test</u> |                | <u>Dunn test with bh -corrected p-values</u> |                |                          |                              |                |                          |                                     |                |                          |
|----------------------|-----------------------------|----------------|----------------------------------------------|----------------|--------------------------|------------------------------|----------------|--------------------------|-------------------------------------|----------------|--------------------------|
|                      | <u>Chi-squared</u>          | <u>P-value</u> | <u>S. cerevisiae - hybrid</u>                |                |                          | <u>S. eubayanus - hybrid</u> |                |                          | <u>S. eubayanus - S. cerevisiae</u> |                |                          |
|                      |                             |                | <u>Z</u>                                     | <u>P-value</u> | <u>corrected P-value</u> | <u>Z</u>                     | <u>P-value</u> | <u>corrected P-value</u> | <u>Z</u>                            | <u>P-value</u> | <u>corrected P-value</u> |
| <b>4°C (15days)</b>  | 16.12(**)                   | 0              | 3.25 (**)                                    | 0.0006         | 0.0009                   | -2.02 (*)                    | 0.0215         | 0.0215                   | -3.58 (**)                          | 0.0002         | 0.0005                   |
| <b>8°C (5days)</b>   | 13.48 (**)                  | 0              | 2.82 (**)                                    | 0.0024         | 0.0036                   | -2.06 (*)                    | 0.0195         | 0.0195                   | -3.38 (**)                          | 0.0004         | 0.0011                   |
| <b>10°C (5 days)</b> | 10.98 (**)                  | 0              | 2.39 (*)                                     | 0.0084         | 0.0125                   | -2.04 (*)                    | 0.0205         | 0.0205                   | -3.13 (**)                          | 0.0009         | 0.0026                   |
| <b>16°C (2days)</b>  | 8.62 (**)                   | 0.01           | 2.51 (*)                                     | 0.0061         | 0.0182                   | -1.27                        | 0.1017         | 0.1017                   | -2.5 (**)                           | 0.0061         | 0.0091                   |
| <b>30°C (2days)</b>  | 6.05 (*)                    | 0.05           | 0.89                                         | 0.1858         | 0.1858                   | 2.37 (*)                     | 0.0089         | 0.0267                   | 1.63                                | 0.0516         | 0.0775                   |
| <b>37°C (2days)</b>  | 11.82 (**)                  | 0              | -2.50 (**)                                   | 0.0061         | 0.0092                   | 2.1 (*)                      | 0.0180         | 0.0180                   | 3.24 (**)                           | 0.0006         | 0.0018                   |
| <b>41°C (2 days)</b> | 27.31 (**)                  | 0              | -5.17 (**)                                   | 0.0000         | 0.0000                   | 0.26                         | 0.3974         | 0.3974                   | 3.05 (**)                           | 0.0011         | 0.0017                   |

**Table S3** obtained results Kruskal-wallis test and pair wise post hoc Dunn tests for comparison aroma production of the generated interspecific hybrids with Saaz- and Frohberg- type reference *S. pastorianus* strains (Kruskal-Wallis test P-value or Benjamini- Hochberg corrected p-value < 0.05: (\*) or < 0.01 : (\*\*))

|                      | Kruskal -wallis test |         | Dunn test with bh -corrected p-values |         |                   |               |         |                   |                 |         |                   |
|----------------------|----------------------|---------|---------------------------------------|---------|-------------------|---------------|---------|-------------------|-----------------|---------|-------------------|
|                      | Chi-squared          | P-value | hybrid - Frohberg                     |         |                   | hybrid - Saaz |         |                   | Saaz - Frohberg |         |                   |
|                      |                      |         | Z                                     | P-value | corrected P-value | Z             | P-value | corrected P-value | Z               | P-value | corrected P-value |
| acetaldehyde         | 15.39 (**)           | 0       | -3.69 (**)                            | 0.0001  | 0.0003            | -2.08         | 0.0187  | 0.0281            | -0.96           | 0.1694  | 0.1694            |
| ethyl acetate        | 17.72 (**)           | 0       | 1.26                                  | 0.1040  | 0.1040            | -3.66 (**)    | 0.0001  | 0.0002            | 4.04 (**)       | 0.0000  | 0.0001            |
| ethyl propionate     | 11.54 (**)           | 0       | 3.39 (**)                             | 0.0004  | 0.0011            | 0.99          | 0.1614  | 0.1614            | 1.66            | 0.0486  | 0.0729            |
| isobutyl acetate     | 16.99 (**)           | 0       | -0.37                                 | 0.3554  | 0.3554            | -4.09 (**)    | 0.0000  | 0.0001            | 3.20 (**)       | 0.0007  | 0.0010            |
| ethyl butyrate       | 6.52 (*)             | 0.04    | -2.50 (**)                            | 0.0062  | 0.0186            | -1.03         | 0.1516  | 0.2274            | -0.97           | 0.1657  | 0.1657            |
| propanol             | 14.89 (**)           | 0       | 1.01                                  | 0.1561  | 0.1561            | -3.43 (**)    | 0.0003  | 0.0005            | 3.65            | 0.0001  | 0.0004            |
| isobutanol           | 4.34                 | 0.11    | -0.32                                 | 0.3757  | 0.3757            | -2.08         | 0.0188  | 0.0563            | 1.53            | 0.0627  | 0.0941            |
| isoamyl acetate      | 16.22 (**)           | 0       | -0.3                                  | 0.3822  | 0.3822            | -3.99 (**)    | 0.0000  | 0.0001            | 3.17 (**)       | 0.0008  | 0.0012            |
| butanol              | 9.94 (*)             | 0.01    | -0.99                                 | 0.1618  | 0.1618            | -3.14 (**)    | 0.0009  | 0.0026            | 1.93            | 0.0265  | 0.0398            |
| isoamyl alcohol      | 11.68 (**)           | 0       | -2.85 (**)                            | 0.0022  | 0.0065            | -2.45 (**)    | 0.0072  | 0.0108            | -0.03           | 0.4893  | 0.4893            |
| phenyl ethyl acetate | 11.17 (**)           | 0       | 1.22                                  | 0.1109  | 0.1109            | -2.78 (**)    | 0.0027  | 0.0041            | 3.26 (**)       | 0.0006  | 0.0017            |
| phenyl ethanol       | 4.03                 | 0.13    | 0.17                                  | 0.4308  | 0.4308            | 1.99          | 0.0232  | 0.0695            | -1.56           | 0.0590  | 0.0885            |

**Table S4 Overview results sensory evaluation from pilot scale fermentation tests by professional tasting panel. Score**

legend: absent (/); very very slightly present (- - -); very slightly present (- -); slightly present (-); mildly present (- +); present (+); clearly present (++); predominant (+++).

|                           |                             | Y134                       | Y397                                  | Y470       | GSY501                  | H15                            | H29                    |
|---------------------------|-----------------------------|----------------------------|---------------------------------------|------------|-------------------------|--------------------------------|------------------------|
| <b>Aroma</b>              | <b>malt</b>                 | grainy (-)                 | /                                     | grainy (-) | /                       | grainy (-)                     | /                      |
|                           | <b>hoppy</b>                | /                          | /                                     | grassy (+) | /                       | /                              | /                      |
|                           | <b>esters</b>               | /                          | fruity<br>(banana/<br>pineapple) (++) | fruity (-) | fruity (pineapple) (++) | /                              | fruity<br>(banana) (-) |
|                           | <b>phenolic</b>             | /                          | /                                     | /          | /                       | /                              | /                      |
| <b>Flavor</b>             | <b>Malt</b>                 | /                          | /                                     | grainy (-) | /                       | grainy (+)                     | /                      |
|                           | <b>Hoppy</b>                | /                          | /                                     | grassy (+) | /                       | /                              | /                      |
|                           | <b>esters</b>               | fruity (apple/pear)<br>(-) | fruity (banana/<br>pineapple) (++)    | fruity(-)  | fruity (pineapple) (++) | /                              | fruity (banana) (+)    |
|                           | <b>phenolic</b>             | /                          | /                                     | /          | /                       | /                              | /                      |
| <b>other</b>              |                             | sulphur (-)                | sulphur (+)/onion (+)                 | /          | /                       | sulphur (- +)/<br>metallic (+) | sulphur (-)            |
| <b>taste/mouthfeel</b>    | <b>Bitterness intensity</b> | +                          | +                                     | +          | +                       | +                              | +                      |
|                           | <b>bitterness quality</b>   | +++                        | +                                     | +++        | +++                     | +                              | +++                    |
|                           | <b>sweet</b>                | -                          | -                                     | ---        | --                      | --                             | --                     |
|                           | <b>body</b>                 | -                          | -                                     | -          | -                       | -                              | +                      |
|                           | <b>astringency</b>          | -                          | --                                    | ---        | ---                     | - +                            | ---                    |
| <b>Overall impression</b> | <b>appreciation</b>         | +                          | - +                                   | +          | +                       | -                              | +                      |
|                           | <b>complexity</b>           | - +                        | - +                                   | --         | - +                     | - +                            | +                      |
|                           | <b>balance</b>              | +                          | --                                    | - +        | +                       | ---                            | - +                    |
